# Supplementary material
Source: PubMed Central journal article supplement (PMC6306886)
Supplement: ba023689-suppl1.pdf [file ba023689-suppl1.pdf]

## Supplemental Table 1

\*2 patients who were last known as alive, but had < 1 year of follow-up were considered failures (1 lost to follow-up, 1 withdrawn consent)

| <b>(Categorical; N(%): 95% Exact CI)</b> | <b>With Mutation</b>   | <b>Without Mutation</b> | <b>Fisher's Exact p-value (2-sided)</b> |
|------------------------------------------|------------------------|-------------------------|-----------------------------------------|
| <b>ASXL1</b>                             | N=27                   | N=91                    |                                         |
| CR                                       | 4 (15%: 4-34)          | 22 (24%: 16-34)         | 0.43                                    |
| 1 Year Survival                          | 13 (48%: 29-68)        | 39 (43%: 33-54)         | 0.66                                    |
| <b>DNMT3A</b>                            | N=23                   | N=95                    |                                         |
| CR                                       | 4 (17%: 5-39)          | 21 (22%:14-32)          | 0.78                                    |
| 1 Year Survival                          | 10 (43%: 23-66)        | 42 (44%: 34-55)         | 1.0                                     |
| <b>IDH2</b>                              | N=17                   | N=101                   |                                         |
| CR                                       | 4 (24%: 7-50)          | 21 (21%: 14-31)         | 0.76                                    |
| <b>1 Year Survival</b>                   | <b>12 (70%: 44-90)</b> | <b>40 (40%: 30-50)</b>  | <b>0.03</b>                             |
| <b>NPM1</b>                              | N=17                   | N=101                   |                                         |
| CR                                       | 5 (29%: 10-56)         | 20 (20%: 13-29)         | 0.35                                    |
| 1 Year Survival                          | 10 (59%: 33-82)        | 42 (42%: 32-52)         | 0.20                                    |
| <b>RUNX1</b>                             | N=19                   | N=99                    |                                         |
| CR                                       | 3 (16%: 3-40)          | 22 (22%: 14-32)         | 0.76                                    |
| 1 Year Survival                          | 10 (53%: 29-76)        | 42 (42%: 33-53)         | 0.46                                    |
| <b>TET2</b>                              | N=20                   | N=98                    |                                         |
| CR                                       | 4 (20%: 6-44)          | 21 (21%: 14-31)         | 1.0                                     |
| 1 Year Survival                          | 9 (45%: 23-68)         | 43 (44%: 34-54)         | 1.0                                     |
| <b>TP53</b>                              | N=26                   | N=92                    |                                         |
| CR                                       | 5 (19%: 7-40)          | 20 (22%: 14-32)         | 1.0                                     |
| <b>1 Year Survival</b>                   | <b>5 (19%: 7-40)</b>   | <b>47 (51%: 40-62)</b>  | <b>0.004</b>                            |
